# Supplementary material for: The electrocatalytic hydrogenation of furanic compounds in a continuous electrocatalytic membrane reactor
Source: Royal Society of Chemistry journal article supplement (doi:10.1039/c3gc00090g), 2013-01-01
Supplement: c3gc00090g.pdf [file c3gc00090g.pdf]

Supplementary Information for:

The Electrocatalytic Hydrogenation of Furanic Compounds in a Continuous Electrocatalytic Membrane Reactor

Sara K. Green,<sup>a</sup> Jechan Lee,<sup>a,b</sup> Hyung Ju Kim,<sup>a,b</sup> Geoffrey A. Tompsett,<sup>a</sup> Won Bae Kim,<sup>c</sup> George W. Huber<sup>\* a,b</sup>

<sup>a</sup> Department of Chemical Engineering, University of Massachusetts-Amherst, 686 North Pleasant Street, Amherst, MA 01002, USA.

<sup>b</sup> Department of Chemical and Biological Engineering, University of Wisconsin-Madison, 1415 Engineering Drive, Madison, WI 53706, USA.

<sup>c</sup> School of Materials Science and Engineering, Gwangju Institute of Science and Technology (GIST), 261 Cheomdan-gwagiro, Buk-gu, Gwangju, 500-712 South Korea

**Table 1** Selectivity towards furfuryl alcohol (FA), tetrahydrofurfuryl alcohol (THFA), 2-methylfuran (MF), and 2-methyltetrahydrofuran (MTHF) from the electrocatalytic hydrogenation of furfural in a continuous electrocatalytic membrane reactor using protons generated from either water electrolysis or hydrogen gas. Reaction conditions: 30°, cathode: 111.7 WHSV furfural over 1.0 mg/cm<sup>2</sup> Pt/C, anode: H<sub>2</sub>O at 0.6 ml/min or 30 sccm H<sub>2</sub> over 4.0 mg/cm<sup>2</sup> Pt-Ru/C.

| Power Input (W) | Selectivity (%)  |                |                  |                |                  |                |                  |                |
|-----------------|------------------|----------------|------------------|----------------|------------------|----------------|------------------|----------------|
|                 | FA               |                | THFA             |                | MF               |                | MTHF             |                |
|                 | H <sub>2</sub> O | H <sub>2</sub> |
| 0.044           | 76.6±7.73        | 58.5±1.39      | 6.6±4.49         | 31.1±0.71      | 10.3±11.93       | 5.1±0.05       | 6.5±3.79         | 5.4±0.32       |
| 0.062           | -                | 60.9±0.45      | -                | 22.4±1.12      | -                | 12.2±0.56      | -                | 4.5±0.11       |
| 0.089           | -                | 65.8±0.33      | -                | 20.3±0.68      | -                | 10.1±0.32      | -                | 3.8±0.04       |
| 0.106           | 69.6±4.97        | -              | 11.8±6.94        | -              | 8.9±7.76         | -              | 9.7±5.59         | -              |

**Table 2** Rate of furfural conversion and product selectivity for the electrocatalytic hydrogenation of furfural in a continuous electrocatalytic membrane reactor using protons generated from water electrolysis both with and without hydrogen gas sparged at the cathode inlet. Reaction conditions: 30°, 0.061W, cathode: 111.7 WHSV furfural over 1.0 mg/cm<sup>2</sup> Pt/C, anode: H<sub>2</sub>O at 0.6 ml/min over 4.0 mg/cm<sup>2</sup> Pt-Ru/C. Hydrogen gas was sparged at the cathode inlet for 10 minutes prior to starting the reaction to ensure saturation. The flow of hydrogen was sufficiently low to ensure no gas bubbles entered the reactor.

|                               | Furf. Conversion Rate (moles/moles Pd min) | Selectivity (%) |           |           |           |
|-------------------------------|--------------------------------------------|-----------------|-----------|-----------|-----------|
|                               |                                            | FA              | THFA      | MF        | MTHF      |
| Without H <sub>2</sub> Sparge | 0.55±0.02                                  | 85±6.81         | 8.36±2.84 | 2.64±0.29 | 4.48±4.25 |
| With H <sub>2</sub> Sparge    | 0.52±0.04                                  | 87±5.47         | 8.20±3.88 | 2.84±1.15 | 2.08±0.45 |
